# Supplementary material
Source: HighWire-hosted journal article supplement (https://www.highwirestage.com/highwire/filestream/71815/field_highwire_adjunct_files/0/19-00784.pdf)
Supplement: 19-00784.pdf [file 19-00784.pdf]

**On-line Table 1: Vascular risk factors in study sample (n = 130)<sup>a</sup>**

| Risk Factors             |            |
|--------------------------|------------|
| BMI (kg/m <sup>2</sup> ) | 27.3 ± 3.7 |
| Current smoker           | 15%        |
| Hypertension             | 90%        |
| Hyperlipidemia           | 93%        |
| Diabetes                 | 19%        |
| Metabolic syndrome       | 52%        |

Note—BMI indicates body mass index.

<sup>a</sup> Values are presented as mean ± SD or %.

**On-line Table 2: Sensitivity analysis of the association between carotid atherosclerosis and ICAS burden**

| ICAS Burden (b-value) <sup>a</sup> (95% CI) |                     |
|---------------------------------------------|---------------------|
| cIMT, per +0.1 mm                           | 0.50 (0.04 to 0.97) |
| cIMT quartiles                              |                     |
| Quartile 1                                  | 0 (Reference)       |
| Quartile 2                                  | 0.93 (−1.98–3.83)   |
| Quartile 3                                  | 0.35 (−2.62–3.33)   |
| Quartile 4                                  | 2.85 (−0.02–5.72)   |
| Carotid stenosis                            |                     |
| No stenosis                                 | 0 (Reference)       |
| 1%–49% stenosis                             | 2.06 (−0.37–4.50)   |
| 50%–100% stenosis                           | 6.23 (1.94–10.52)   |

<sup>a</sup> B-values are unstandardized linear regression coefficients adjusted for age, sex, and time interval between carotid sonography and 7T MR imaging.

**On-line Table 3: Sensitivity analysis of the association between ABI and ICAS burden**

| ICAS Burden (b-value) <sup>a</sup> (95% CI) |                   |
|---------------------------------------------|-------------------|
| ABI, per +0.1 in ratio                      | −0.34 (−0.89–0.2) |
| ABI > 0.9                                   | 0 (Reference)     |
| ABI ≤ 0.9                                   | 5.08 (2.00–8.16)  |

<sup>a</sup> B-values are unstandardized linear regression coefficients adjusted for age, sex, and time interval between ABI measurement and 7T MR imaging.

**On-line Table 4: Sensitivity analysis of the association between renal function and ICAS burden**

| ICAS Burden (b-value) <sup>a</sup> (95% CI) |                        |
|---------------------------------------------|------------------------|
| eGFR, per +10 mL/min                        | −0.78 (−1.50 to −0.06) |
| eGFR ≥60 mL/min                             | 0 (Reference)          |
| eGFR <60 mL/min                             | 3.02 (0.31–5.72)       |

<sup>a</sup> B-values are unstandardized linear regression coefficients adjusted for age, sex, and time interval between eGFR measurement and 7T MR imaging.

**On-line Table 5: Sensitivity analysis of the association between history of vascular disease and ICAS burden**

| ICAS Burden (b-value) <sup>a</sup> (95% CI) |                   |
|---------------------------------------------|-------------------|
| Coronary artery disease                     | 0 (Reference)     |
| Peripheral artery disease                   | 0.09 (−3.66–3.84) |
| Cerebrovascular disease                     | 0.55 (−2.94–4.04) |
| Multivascular disease                       | 1.93 (−0.73–4.59) |

<sup>a</sup> B-values are unstandardized linear regression coefficients adjusted for age, sex, and time interval between ECAS and ICAS measurement. Categories are mutually exclusive.

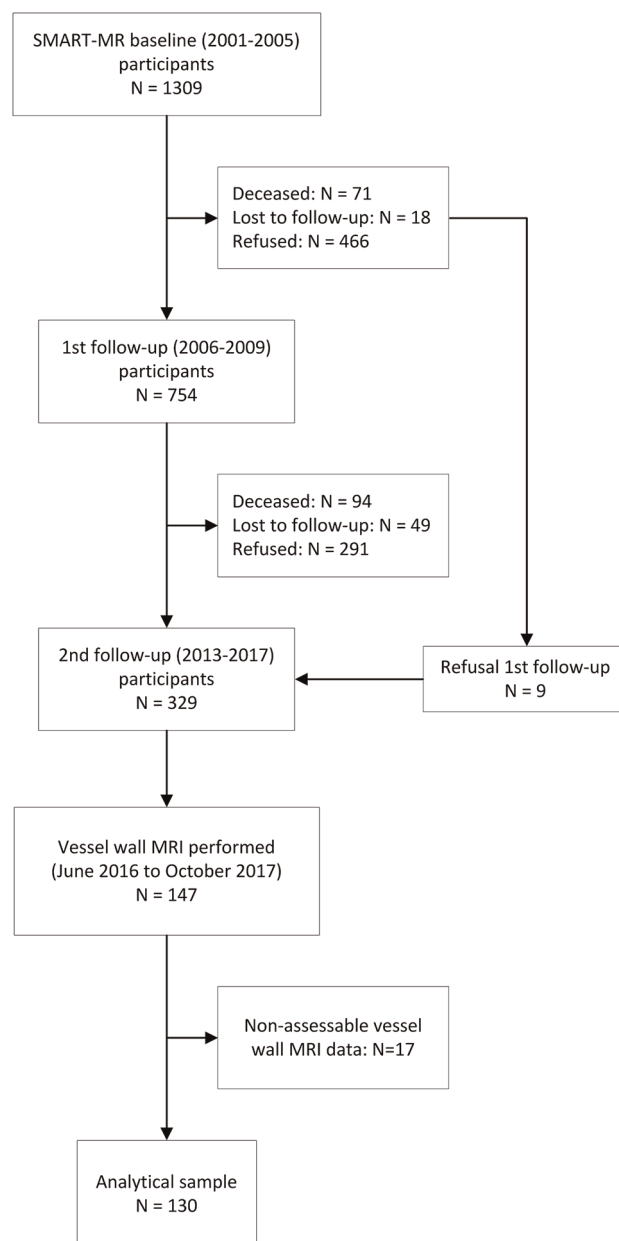**ON-LINE FIG.** Flowchart of the study sample.
